# Supplementary material for: Yeast Endocytic Adaptor AP-2 Binds the Stress Sensor Mid2 and Functions in Polarized Cell Responses
Source: PubMed Central journal article supplement (PMC4282331; doi:10.1111/tra.12155), 2014-02-25
Supplement: tra0015-0546-SD1.pdf [file tra0015-0546-SD1.pdf]

**Table 1: Yeast strains used in this study**

| Name    | Genotype                                                                                                                           | Notes/origin            |
|---------|------------------------------------------------------------------------------------------------------------------------------------|-------------------------|
| BWP17   | <i>URA3::λimm434/URA3::λimm434his1::hisG/his1::hisG</i><br><i>arg4::hisG/arg4::hisG</i>                                            | Wilson 1999             |
| KAY1776 | <i>URA3::λimm434/URA3::λimm434his1::hisG/his1::hisG</i><br><i>arg4::hisG/arg4::hisG, apm4Δ::ARG4/apm4Δ::URA3</i>                   | This study              |
| KAY1217 | <i>a/α his3Δ/his3Δ, leu2Δ/ leu2Δ, ura3Δ/ ura3Δ</i> (Σ1278 strain)                                                                  | D.Drubin,<br>Berkeley   |
| KAY1732 | <i>a/α his3Δ/his3Δ, leu2Δ/ leu2Δ, ura3Δ/ ura3Δ,</i><br><i>apm4Δ::HIS3/apm4Δ::HIS3</i>                                              | This study              |
| BY4741  | <i>MATa his3Δ1, leu2Δ, ura3Δ, met15Δ</i>                                                                                           | Invitrogen              |
| KAY1742 | <i>MATa his3Δ1, leu2Δ, ura3Δ, met15Δ, APL1-GFP::HIS3</i>                                                                           | This study              |
| KAY1747 | <i>MATa his3Δ1, leu2Δ, ura3Δ, met15Δ, APL1-GFP::HIS3 apm4Δ::KanMx</i>                                                              | This study              |
| KAY736  | <i>MATa his3Δ1, leu2Δ, ura3Δ, met15Δ, MID2-GFP::HIS3</i>                                                                           | Invitrogen              |
| KAY1733 | <i>MATa his3Δ1, leu2Δ, ura3Δ, met15Δ, MID2-GFP::HIS3, apm4Δ::URA3</i>                                                              | This study              |
| KAY53   | <i>MATa glc7ΔLEU2, trp1::GLC7::TRP1, ade2-1, his3-11, leu2-3,112,</i><br><i>trp1-1, ura3-1can1-100, ssd1-d2, Gal+, mid2Δ::URA3</i> | This study              |
| KAY120  | <i>MATa ura3-52, lys2-801, ade2-101, trp1-Δ63, his3-Δ200, leu2-Δ1,</i><br><i>sst1::hisG</i>                                        | J.Thorner<br>(Berkeley) |
| KAY1690 | <i>MATa ura3-52, lys2-801, ade2-101, trp1-Δ63, his3-Δ200, leu2-Δ1,</i><br><i>sst1::hisG, apm4Δ::URA3</i>                           | This study              |
| KAY1700 | <i>MATa his3Δ1, leu2Δ, ura3Δ, met15Δ, apm4Δ::KanMx</i>                                                                             | This study              |
| KAY1798 | KAY120 with integrated <i>GFPCdc4::LEU2</i>                                                                                        | This study              |
| KAY1799 | KAY1690 with integrated <i>GFPCdc4::LEU2</i>                                                                                       | This study              |
| KAY1805 | KAY736 + <i>sla2ΔLEU2</i>                                                                                                          | This study              |
| KAY1787 | <i>MATa ade2-1 leu2-3,112 his3-11,15 trp1-1 ura3-1 PKC1-</i><br><i>GFP(S65T)::His3MX can1-100 ssd1-d2 Gal<sup>+</sup></i>          | (27)                    |
| KAY1788 | KAY1787 + <i>apm4Δ::URA3</i>                                                                                                       | This study              |
