# Supplementary material for: Yeast Endocytic Adaptor AP-2 Binds the Stress Sensor Mid2 and Functions in Polarized Cell Responses
Source: PubMed Central journal article supplement (PMC4282331; doi:10.1111/tra.12155), 2014-02-25

### Supplementary Figure 2

**Mid2-GFP levels at the plasma membrane are higher in *apm4* null cells.** After 30 minutes of exposure to pheromone the fluorescence intensity of plasma membrane staining was analysed in wild type and *apm4* $\Delta$  cells as a measure of the level of Mid2-GFP. Intensities were measured at 2 points per cell where a line drawn perpendicular to the axis of polarised growth assessed morphologically, and through the centre of the cell, bisected the plasma membrane. Data from 3 independent experiments and analysis of > 100 cells total. In a student t-test significance P value <0.0001. Mean wt  $380.1 \pm 14.24$  SEM n=103; *apm4* $\Delta$  mean  $637.9 \pm 25.73$  n=103.

Plasma membrane intensity of  
Mid2-GFP

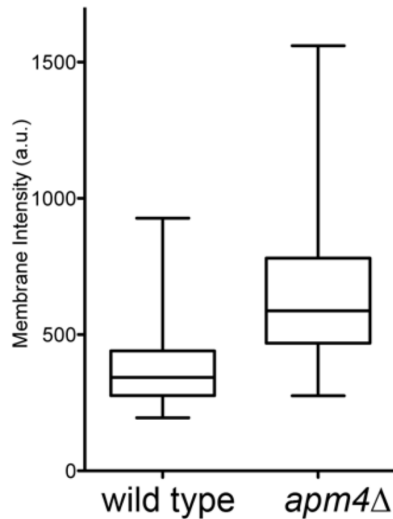

Supplement: tra0015-0546-SD5.pdf [file tra0015-0546-SD5.pdf]
