# Supplementary material for: Yeast Endocytic Adaptor AP-2 Binds the Stress Sensor Mid2 and Functions in Polarized Cell Responses
Source: PubMed Central journal article supplement (PMC4282331; doi:10.1111/tra.12155), 2014-02-25

**Supplementary Figure 3. The effect on Apm4 binding and Mid2 localization of a Y278 mutation in the Mid2 cytoplasmic tail.** (A) GST alone; GST tagged Apm4 ; His-tagged Mid2 or Mid2 Y278 were prepared as described and their binding interaction tested using pull down assays on beads with 20  $\mu$ M Mid2. Apm4 is clearly seen on a Generon NUVView gel, along with a faint band for Mid2 (arrow). Mid2 was detected using anti-His tag antibodies after western blotting. This band was verified as Mid2 using mass spectrometry. (B) Mid2-GFP and Mid2-Y278A-GFP were transformed into cells otherwise lacking *mid2* (KAY53) or both *mid2* and *apm4* (KAY1700). Localization after 1 hour incubation with alpha factor was observed microscopically.

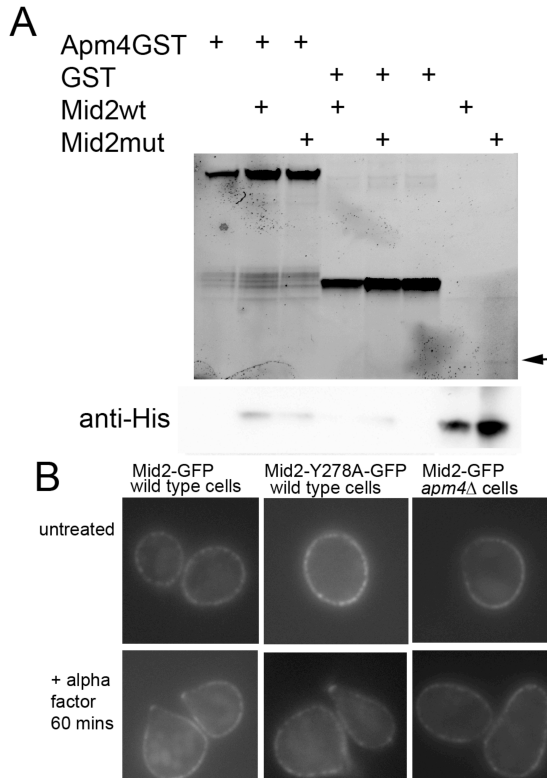

Supplement: tra0015-0546-SD7.pdf [file tra0015-0546-SD7.pdf]
