# Supplementary material for: Yeast Endocytic Adaptor AP-2 Binds the Stress Sensor Mid2 and Functions in Polarized Cell Responses
Source: PubMed Central journal article supplement (PMC4282331; doi:10.1111/tra.12155), 2014-02-25

**Supplementary Figure 3**

**Effect of pheromone on organization of actin patches in wild type and *apm4* $\Delta$  cells.** Abp1-GFP was transformed into KAY120 and KAY1690 cells and visualized in live cells 90 minutes after pheromone addition.

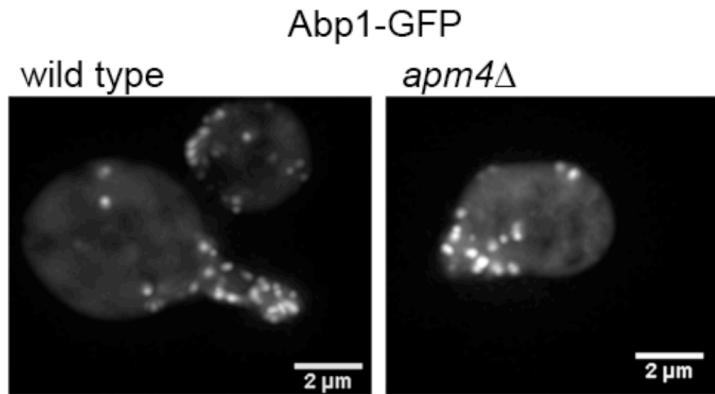

Supplement: tra0015-0546-SD9.pdf [file tra0015-0546-SD9.pdf]
